# Supplementary material for: An amplified platform nanostructure sensor for the analysis of epirubicin in the presence of topotecan as two important chemotherapy drugs for breast cancer therapy
Source: Royal Society of Chemistry journal article supplement (doi:10.1039/c7nj04430e), 2018-01-01
Supplement: c7nj04430e1.pdf [file c7nj04430e1.pdf]

## Supplementary information data

### An amplified platform nanostructure sensor for the analysis of epirubicin in the presence of topotecan as two important chemotherapy drugs for breast cancer therapy

*Seyed A.R. Alavi-Tabari, Hassan Karimi-Maleh, \* Mohammad A. Khalilzadeh\*, Daryoush Zareyee*

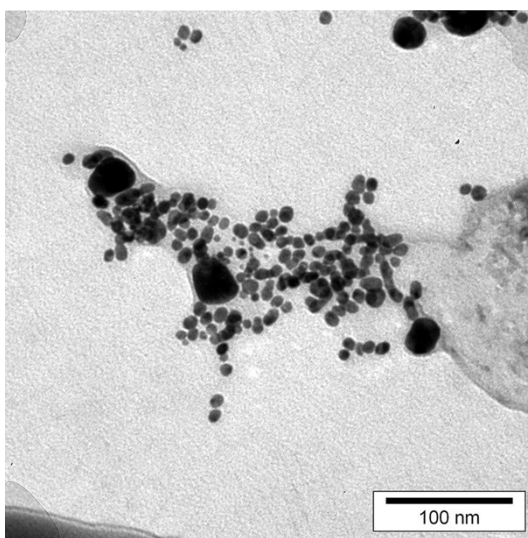

**Figure S1:** TEM image of Cu nanoparticle.

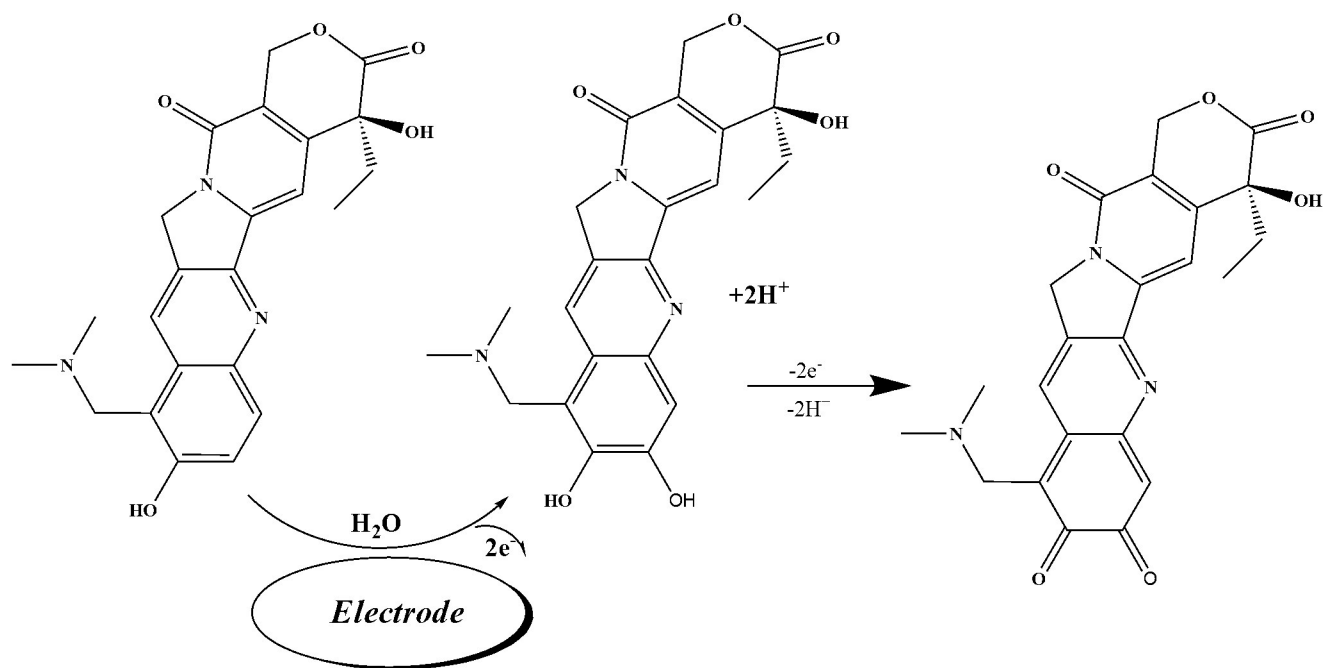

**Scheme S1:** Electro-oxidation mechanism for topotecan
